# Supplementary material
Source: PubMed Central journal article supplement (PMC7822145)
Supplement: zii999093273s1.pdf [file zii999093273s1.pdf]

## Supplemental Material

### **(p)ppGpp-dependent regulation of the nucleotide hydrolase PpnN confers complement resistance in *Salmonella enterica* serovar Typhimurium**

N. Y Elizabeth Chau<sup>a, b</sup>, Deyanira Pérez-Morales<sup>c</sup>, Wael Elhenawy<sup>a, b</sup>, Víctor H. Bustamante<sup>c</sup>, Yong E. Zhang<sup>d</sup>, Brian K. Coombes<sup>a, b\*</sup>

<sup>a</sup>Department of Biochemistry & Biomedical Sciences, McMaster University, Hamilton, ON

<sup>b</sup>Michael G. DeGroote Institute for Infectious Disease Research, McMaster University, Hamilton, ON

<sup>c</sup>Departamento de Microbiología Molecular, Instituto de Biotecnología, Universidad Nacional Autónoma de México, Cuernavaca, Morelos, México

<sup>d</sup>Department of Biology, University of Copenhagen, 2200 Copenhagen, Denmark

\*Corresponding author: Brian K. Coombes, [coombes@mcmaster.ca](mailto:coombes@mcmaster.ca)

Running title: PpnN confers complement resistance

1 **Figure S1. RelA-SpoT is required for growth in minimal medium.** Growth curves of  
2 wild type *S. Typhimurium*,  $\Delta relA$ ,  $\Delta relA \Delta spoT$ , and  $\Delta ppnN$  in (A) LB and (B) M9-  
3 glucose media. Data are the means  $\pm$  SEM (error bars) of three independent experiments.

4  
5 **Figure S2. PpnN from *E. coli* str. K-12 and *S. Typhimurium* str. SL1344 share**  
6 **significant amino acid sequence homology.** (A) PpnN has two domains of unknown  
7 function, DUF4478 and DUF3412, and a lysine decarboxylase (LDC)-like domain. The  
8 LDC-like domain contains a conserved “PGG<sub>x</sub>GT<sub>xx</sub>E” motif characteristic of the Lonely  
9 Guy (LOG) protein family. (B) Amino acid sequence alignment of PpnN from *E. coli* str.  
10 K-12 and *S. Typhimurium* str. SL1344. Protein sequences share 94% pairwise identity in  
11 amino acid sequences. DUF4478, DUF3412, and LDC-like domains are highlighted. The  
12 conserved “PGG<sub>x</sub>GT<sub>xx</sub>E” motif found in LOG homologues is underlined in red. Asterisks  
13 indicate the amino acid residues involved in (p)ppGpp binding.

14  
15 **Figure S3. PpnN from *E. coli* str. K-12 is a pyrimidine/purine nucleosidase.** PpnN  
16 hydrolyzes uridine 5'-monophosphate (UMP) to uracil and ribose 5'-phosphate. Heat-  
17 inactivation of PpnN abrogates protein function. Data are representative of two replicates.

18  
19 **Figure S4. PpnN from *S. Typhimurium* str. SL1344 is a pyrimidine/purine**  
20 **nucleosidase.** PpnN hydrolyzes guanosine 5'-monophosphate (GMP) to guanine and  
21 ribose 5'-phosphate. Introduction of an E264Q mutation in PpnN abrogates protein  
22 function. Data are representative of two replicates.

23 **Figure S5. PpnN does not contribute to the protein composition of the outer**  
24 **membrane.** Outer membrane protein composition of the  $\Delta ppnN$  mutant is similar to wild  
25 type *S. Typhimurium* str. SL1344, whereas, the  $\Delta relA \Delta spoT$  mutant shows significant  
26 differences. Data are representative of two replicates.

27  
28  
29  
30  
31  
32  
33  
34  
35  
36  
37  
38  
39  
40  
41  
42

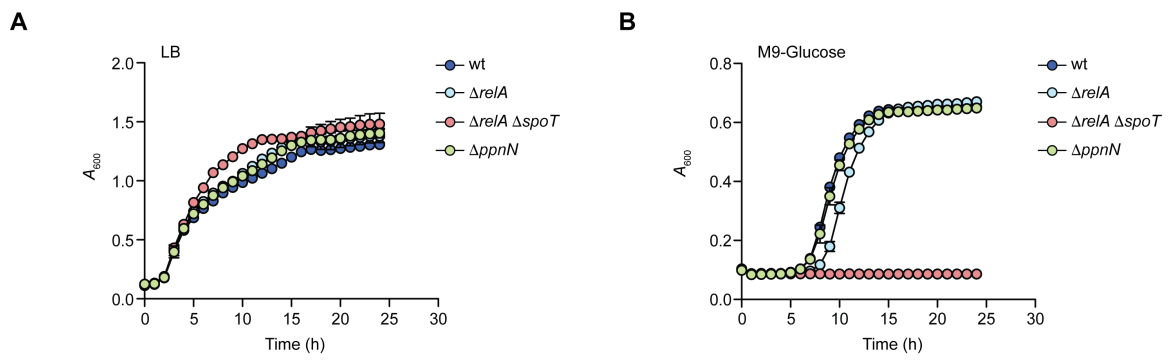

Figure S1

43

44

45

46

47

48

49

50

51

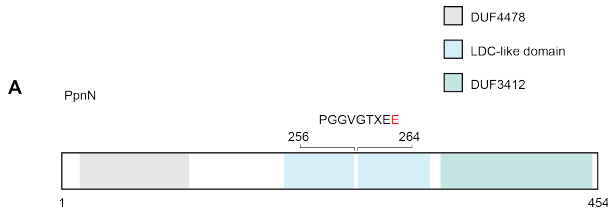

52

**B**

|                       |     |                                                                                                                                               |
|-----------------------|-----|-----------------------------------------------------------------------------------------------------------------------------------------------|
| <i>E. coli</i>        | 1   | M I T H I S P L G S M D M L S Q L E V D M L K R T A S S D L Y Q L F R N C S L A V L N S G S L T D N S K E L L S R F E N F D I N V L R R E R G |
| <i>S. Typhimurium</i> | 1   | M I T H I S P L G S M D M L S Q L E V D M L K R T A S S D L Y Q L F R N C S L A V L N S G S L T D N S K E L L S R F E N F D I N V L R R E R G |
| <i>E. coli</i>        | 72  | V K L E L I N P P E E A F V D G R I I R A L Q A N L F A V L R D I L F V Y G Q I H N T V R F P N L N L D N S V H I T N L V F S I L R N A R A L |
| <i>S. Typhimurium</i> | 72  | V K L E L I N P P E A F V D G R I I R A L Q A N L F A V L R D I L F V N G Q I H N A G R F Q H L D L E S S T H I T N L V F S I L R N A R A L   |
| <i>E. coli</i>        | 143 | H V G E A P N M V V C W G G H S I N E N E Y L Y A R R V G N Q L G L R E L N I C T G C G P G A M E A P M K G A A V G H A Q Q R Y K D S R F I G |
| <i>S. Typhimurium</i> | 143 | H V G E A P N M V V C W G G H S I N E N E Y L Y A R R V G T Q L G L R E L N I C T G C G P G A M E A P M K G A A V G H A Q Q R Y K D S R F I G |
| <i>E. coli</i>        | 214 | M T E P S I I A A E P P N P L V N E L I I M P D I E K R L E A F V R I A H G I I I F P G G V G T A E E L L Y L L G I L M N P A N K D Q V L P L |
| <i>S. Typhimurium</i> | 214 | M T E P S I I A A E P P N P L V N E L I I M P D I E K R L E A F V R I A H G I I I F P G G V G T A E E L L Y L L G I L M N P A N K N Q V L P L |
| <i>E. coli</i>        | 285 | I L T G P K E S A D Y F R V L D E F V V H T L G E N A R R H Y R I I I D D A A E V A R L M K K S M P L V K E N R R D T G D A Y S F N W S M R I |
| <i>S. Typhimurium</i> | 285 | I L T G P K E S A D Y F R V L D E F I T H T L G E A A R R H Y R I I I D D A A E V A R L M K K A M P Q V K E N R R D T G D A Y S F N W S M R I |
| <i>E. coli</i>        | 356 | A P D L Q M P F E P S H E N M A N L K L Y P D Q P V E V L A A D L R R A F S G I V A G N V K E V G I R A I E E F G P Y K I N G D K E I M R R M |
| <i>S. Typhimurium</i> | 356 | A P D L Q V P F E P S H E N M A N L K L Y P D Q P V E I L A A D L R R A F S G I V A G N V K E V G I R A I E A N G P Y K I H G D R E M M R R M |
| <i>E. coli</i>        | 427 | D D L L Q G F V A Q H R M K L P G S A Y I P C Y E I C T                                                                                       |
| <i>S. Typhimurium</i> | 427 | D D L L Q G F V A Q H R M K L P G S A Y I P C Y E I C A                                                                                       |

Legend:  
 □ DUF4478   □ LDC-like domain   □ DUF3412

59

Figure S2

60

61

62

63

64

65

66

67

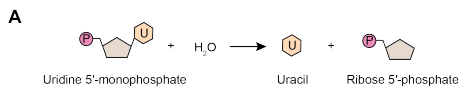

68

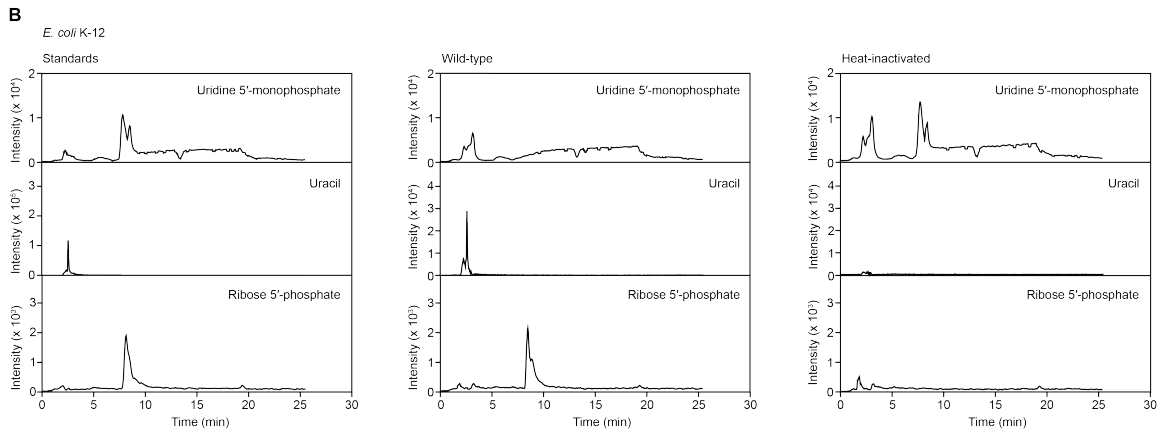

69

70

71

72

73

74

Figure S3

75

76

77

78

79

80

81

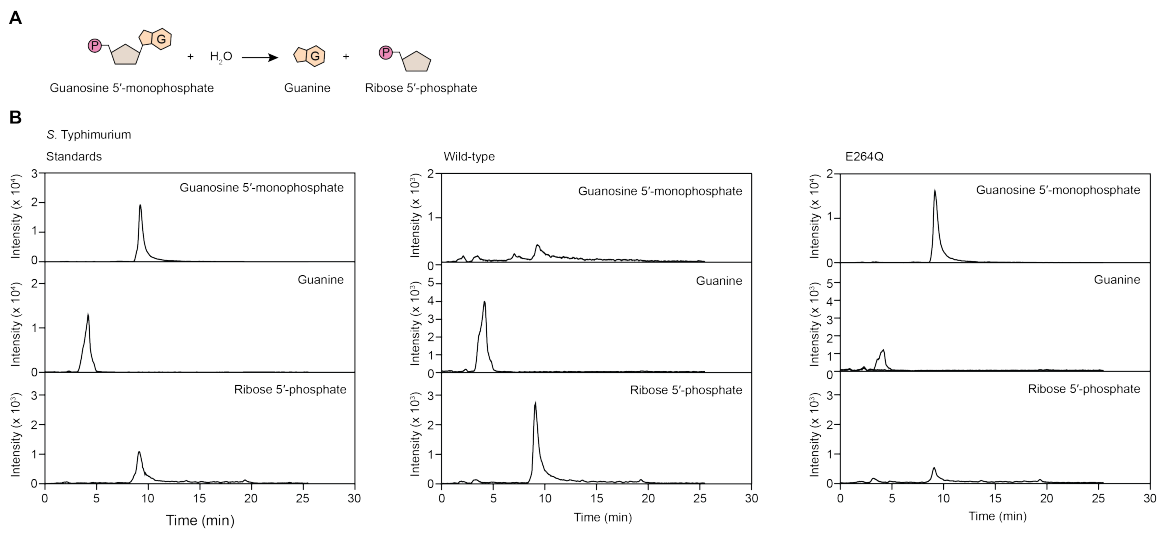

Figure S4

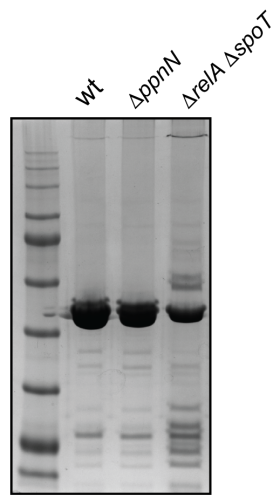

**Figure S5**
